# Supplementary material
Source: Springer Nature journal article supplement (https://www.springermedizin.de/resource/supplementary/13041_2013_221_MOESM11_ESM.pdf/25657772)

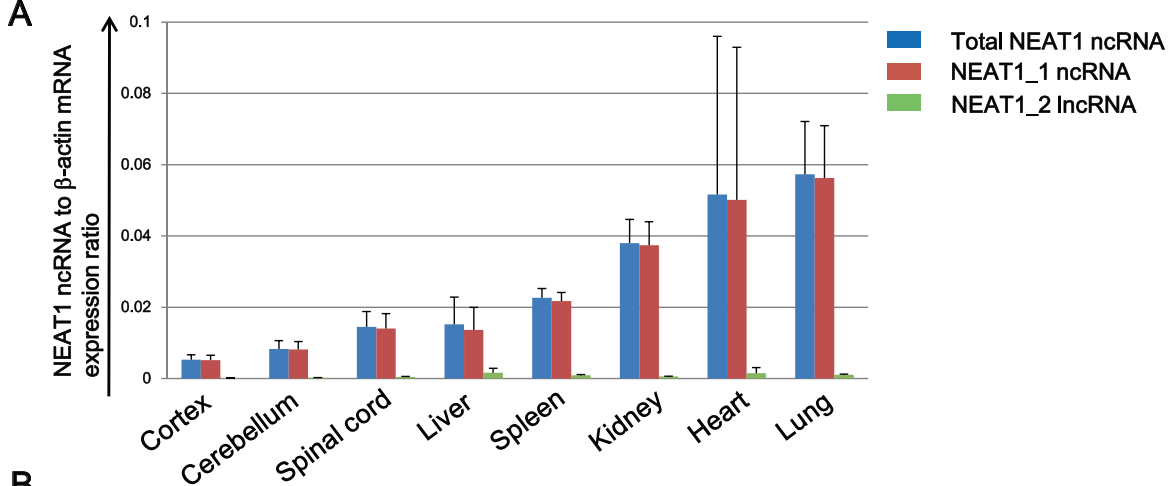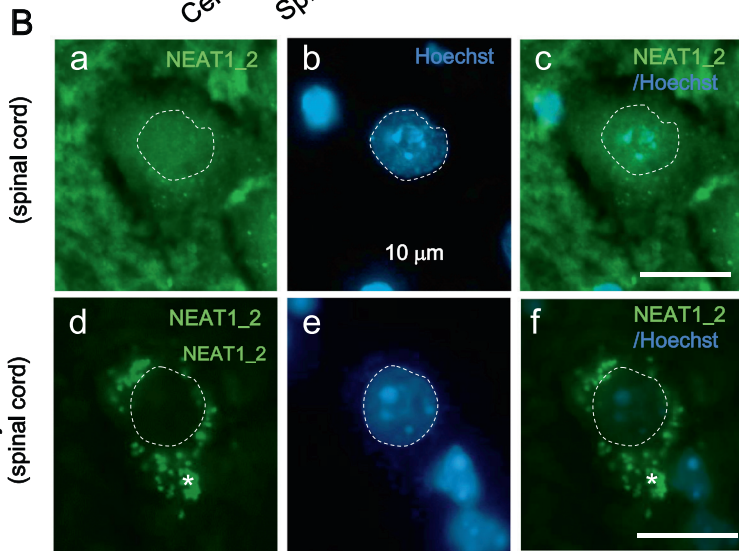

8-week-old (colon)

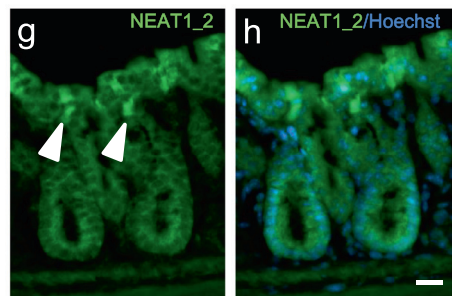

Supplement: MOESM11 [file 25657772]
